# Supplementary material
Source: HighWire-hosted journal article supplement (https://cmaj.ca/highwire/filestream/78969/field_highwire_adjunct_files/2/202262-res-3-at.pdf)
Supplement: 202262-res-3-at.pdf [file 202262-res-3-at.pdf]

**Appendix 3. BORN Information system (BIS), international classification of diseases (tenth revision, Canada), and Canadian classification of health interventions variables used to code the AOI. BORN Information system (BIS), international classification of diseases (tenth revision, Canada), and Canadian classification of health interventions variables used to code the AOI.**

| Adverse outcome indicator (AOI)          | Source    | Variable                      | Coding                                                   | Coding Description                                                                                                                              |
|------------------------------------------|-----------|-------------------------------|----------------------------------------------------------|-------------------------------------------------------------------------------------------------------------------------------------------------|
| <b>Maternal death</b>                    | BIS       | maternal_outcome_id           | 1016480, 1016470                                         | Maternal Death ( <i>one of any code listed</i> )                                                                                                |
|                                          | ICD-10-CA |                               | O95, O97                                                 |                                                                                                                                                 |
|                                          | DAD       | discharge_disposition         | 07                                                       |                                                                                                                                                 |
| <b>Uterine rupture during labour</b>     | BIS       | indication_for_CS_id          | 1023900                                                  | Maternal\Uterine rupture<br><i>OR</i>                                                                                                           |
|                                          |           | lbr_and_birth_complication_id | 1014600                                                  | Uterine rupture<br><i>OR</i>                                                                                                                    |
|                                          | ICD-10-CA |                               | O7118                                                    | Uterine rupture during labour                                                                                                                   |
| <b>Maternal ICU admission</b>            | DAD       | scu_code_1- scu_code_6        | 10 20 25 30 35 40 45 60 70 90 93 95                      | Any ICU Unit or Step-down Medical or Surgical Unit<br><i>OR</i>                                                                                 |
|                                          | CCI       |                               | 1GJ50CANG, 1GJ50CATS                                     | Insertion of endotracheal tube or intubation with other tube<br><i>OR</i>                                                                       |
|                                          |           |                               | 1GZ31CBND                                                | Positive pressure ventilation, non-invasive<br><i>OR</i>                                                                                        |
|                                          |           |                               | 1GZ31CAND, 1GZ31CRND, 1GZ31GPN D                         | Positive pressure ventilation, via invasive route<br><i>OR</i>                                                                                  |
|                                          |           |                               | 1GZ38JAND, 1GZ38JANE                                     | Management (adjustment, initiation, weening) of positive pressure ventilator or positive end expiratory pressure ventilator (PEEP)<br><i>OR</i> |
|                                          |           |                               | 1GZ30CJ, 1GZ30JH                                         | Resuscitation<br><i>OR</i>                                                                                                                      |
|                                          | BIS       | maternal_outcome_id           | 1016500                                                  | Transfer to ICU/CCU                                                                                                                             |
| <b>Unanticipated operative procedure</b> | CCI       |                               | 5MD60KE, 5MD60RC, 5MD60CB, 5MD60RD                       | Caesarean hysterectomy<br><i>OR</i>                                                                                                             |
|                                          |           |                               | 1RM.89LA (exclude if 1PL74, 1RS74 or 1RS80 also present) | Total hysterectomy, open approach<br><i>OR</i>                                                                                                  |
|                                          |           |                               | 1RM87LA-GX                                               | Subtotal hysterectomy, open approach<br><i>OR</i>                                                                                               |
|                                          |           |                               | 1.PZ.21^^                                                | Dialysis, urinary system NEC                                                                                                                    |

|                                                                                                                             |           |                                                  |                                                 |                                                                                                                                    |
|-----------------------------------------------------------------------------------------------------------------------------|-----------|--------------------------------------------------|-------------------------------------------------|------------------------------------------------------------------------------------------------------------------------------------|
|                                                                                                                             |           |                                                  |                                                 | <i>OR</i>                                                                                                                          |
|                                                                                                                             |           |                                                  | 5PC73JS                                         | Evacuation of incisional hematoma<br><i>OR</i>                                                                                     |
|                                                                                                                             |           |                                                  | 5PC80JM                                         | Reclosure of caesarean wound<br><i>OR</i>                                                                                          |
|                                                                                                                             |           |                                                  | 5PC80JR, 1NK80^^,<br>1NM80^^                    | Repair of bladder, urethra or intestine<br><i>OR</i>                                                                               |
|                                                                                                                             |           |                                                  | (1RM13^^ or 1KT51 or<br>5PC91LA) + O72          | Embolization or ligation of pelvic vessels or suturing of<br>uterus (e.g., B-Lynch suture) & postpartum<br>hemorrhage<br><i>OR</i> |
|                                                                                                                             |           |                                                  | 5PC91GA                                         | Dilation and curettage, following delivery<br><i>OR</i>                                                                            |
|                                                                                                                             |           |                                                  | 5PC91GC                                         | Aspiration and curettage, following delivery<br><i>OR</i>                                                                          |
|                                                                                                                             |           |                                                  | 5PC91HT                                         | Uterine (and vaginal) packing, following delivery                                                                                  |
| <b>Maternal blood<br/>transfusion</b>                                                                                       | CCI       |                                                  | 1LZ19HHU, 1LZ19HHU9,<br>1LZ19HMU1,<br>1LZ19HMU9 | Transfusion of blood or blood products<br><i>OR</i>                                                                                |
|                                                                                                                             | ICD-10-CA |                                                  | Z513                                            | Blood transfusion (without reported diagnosis)<br><i>OR</i>                                                                        |
|                                                                                                                             | DAD       | Mom_BLOOD_TRANSFUSION_IND                        | Y                                               | Blood transfusion/blood products received during<br>hospitalization                                                                |
| <b>3<sup>rd</sup> or 4<sup>th</sup> degree<br/>perineal tear</b>                                                            | BIS       | perineal_laceration_id                           | 1019960, 1019970                                | 3 <sup>rd</sup> degree, 4 <sup>th</sup> degree                                                                                     |
| <b>Intrapartum or in-<br/>hospital newborn<br/>death with birth<br/>weight ≥2,500g<br/>with no congenital<br/>anomalies</b> | BIS       | b_birth_weight_gramms                            | ≥2500                                           | Greater than or equal to 2500 grams<br><i>AND</i>                                                                                  |
|                                                                                                                             |           | neonatal_death_id                                | 1018200                                         | Neonatal Death<br><i>OR</i>                                                                                                        |
|                                                                                                                             |           | pregnancy_outcome_id                             | 1021090                                         | Intrapartum stillbirth<br><i>OR</i>                                                                                                |
|                                                                                                                             | DAD       | b_rectype                                        | 1                                               | Stillbirth<br><i>OR</i>                                                                                                            |
|                                                                                                                             |           | baby_b_rectype AND<br>baby_discharge_disposition | 2, 3<br>07                                      | (Live birth <i>AND</i><br>Death)<br><i>OR</i>                                                                                      |
|                                                                                                                             |           | baby_nnd                                         | 1                                               | Neonatal death                                                                                                                     |
|                                                                                                                             | ICD-10-CA |                                                  | Q00-Q99                                         | <i>EXCLUDE</i><br>Congenital anomalies                                                                                             |

|                                                                                                                                                                           |           |                                                                             |                                                                                                                  |                                                                                                                                                                                                                                                                                                                                                                                                                            |
|---------------------------------------------------------------------------------------------------------------------------------------------------------------------------|-----------|-----------------------------------------------------------------------------|------------------------------------------------------------------------------------------------------------------|----------------------------------------------------------------------------------------------------------------------------------------------------------------------------------------------------------------------------------------------------------------------------------------------------------------------------------------------------------------------------------------------------------------------------|
| <b>Birth trauma</b>                                                                                                                                                       | BIS       | newborn_condition_cmplctn_id                                                | 1018421 1018422 1018423 1018340 1018341 1018380 1018381 1018424 1018425                                          | <i>One of:</i> Intracranial hemorrhage, Subarachnoid hemorrhage, Subdural hemorrhage, Brachial plexus injury, Facial nerve injury, unspecified birth injury, other birth injury<br><i>OR</i>                                                                                                                                                                                                                               |
|                                                                                                                                                                           |           | neonatal_health_problem_id                                                  | 1026340                                                                                                          | Birth Trauma<br><i>OR</i>                                                                                                                                                                                                                                                                                                                                                                                                  |
|                                                                                                                                                                           | ICD-10-CA |                                                                             | P10.1, P10.2, P10.3, P12.2, P13 (excluding P13.4), P11.5, P11.3, P14.0, P14.1, P14.3, P11.4, P14.2, P14.8, P14.9 | <i>One of:</i> Hemorrhage (cerebral, intraventricular or subarachnoid, epicranial subaponeurotic) due to birth injury, birth injury to skeleton (excluding fracture of clavicle), birth injury to spine and spinal cord or facial nerve, paralysis (Erb's, Klumpke's, phrenic nerve) due to birth injury, other brachial plexus injuries, birth injury to other cranial nerves, birth injury to other perph nervous system |
| <b>NICU admission for 2 days or more, or transfer within 24 hours of birth, for infants with birthweight greater or equal to 2500 grams, without congenital anomalies</b> | BIS       | birth_weight_gramms                                                         | ≥2500                                                                                                            | Greater than or equal to 2500 grams<br><i>AND</i>                                                                                                                                                                                                                                                                                                                                                                          |
|                                                                                                                                                                           | DAD       | scu_code_1- scu_code_6<br><i>AND</i><br>total_scu_los_hours                 | 50 51 52 53<br><br>>48                                                                                           | NICU Unit<br><i>AND</i><br>NICU length of stay greater than 48 hours<br><i>OR</i>                                                                                                                                                                                                                                                                                                                                          |
|                                                                                                                                                                           |           | xfer_scu1-xfer_scu24<br><i>AND</i><br>xfer_admission_date_1 minus birthdate | 1<br><br>≤ 1                                                                                                     | Transfer to SCU unit<br><i>AND</i><br>Date of transfer within 1 day of birth                                                                                                                                                                                                                                                                                                                                               |
|                                                                                                                                                                           | ICD-10-CA |                                                                             | Q00-Q99                                                                                                          | <i>EXCLUDE</i><br>Congenital anomalies                                                                                                                                                                                                                                                                                                                                                                                     |
| <b>5-min Apgar score &lt; 7</b>                                                                                                                                           | BIS       | apgar05_id                                                                  | <7                                                                                                               | Apgar Score less than 7                                                                                                                                                                                                                                                                                                                                                                                                    |
